# Supplementary material for: Healthcare professionals’ attitudes towards digital health interventions and perspectives on digital health inequalities: a qualitative study
Source: bioRxiv or medRxiv preprint supplement (doi:10.1101/2024.07.06.24310027), 2024-07-08
Supplement: Supplementary file [file media-1.pdf]

## Supplementary 1: Focus group guide for HCPs: barriers and facilitators to uptake of DHIs at an individual and intervention level

**NB: Schedules were adapted for individual interviews and according to the professional composition of the group**

|                                              |                                                                                                                                                                                                                                                                                                                                                                                                                                                                                                                                                                                                                                                                                                                                                                                                                                                                                                                                                                                                                                                                                                          |
|----------------------------------------------|----------------------------------------------------------------------------------------------------------------------------------------------------------------------------------------------------------------------------------------------------------------------------------------------------------------------------------------------------------------------------------------------------------------------------------------------------------------------------------------------------------------------------------------------------------------------------------------------------------------------------------------------------------------------------------------------------------------------------------------------------------------------------------------------------------------------------------------------------------------------------------------------------------------------------------------------------------------------------------------------------------------------------------------------------------------------------------------------------------|
| Study and participant introduction           | <ul style="list-style-type: none"> <li>• Welcome</li> <li>• Permission to record</li> <li>• Participant introductions</li> <li>• Introduction of focus group aims and outline of the session</li> <li>• Online session 'rules'</li> </ul>                                                                                                                                                                                                                                                                                                                                                                                                                                                                                                                                                                                                                                                                                                                                                                                                                                                                |
| DHIs introduction                            | <ul style="list-style-type: none"> <li>• Definition of DHIs</li> <li>• Allow time for questions before start</li> </ul>                                                                                                                                                                                                                                                                                                                                                                                                                                                                                                                                                                                                                                                                                                                                                                                                                                                                                                                                                                                  |
| <i>Part 1</i>                                | <i>In this section we seek to understand use of DHIs in South Asian populations, and for CVD and DM.</i>                                                                                                                                                                                                                                                                                                                                                                                                                                                                                                                                                                                                                                                                                                                                                                                                                                                                                                                                                                                                 |
| Professional experience of DHIs for CV or DM | <ul style="list-style-type: none"> <li>• What professional experience do you have with DHIs for cardiovascular disease or diabetes (or for other health problems)?<br/> <i>Prompts:</i> <ul style="list-style-type: none"> <li>○ <i>E.g. working at front-line with patients on implementation and use, developing technology, or other?</i></li> <li>○ <i>If no, what is your professional experience related to DHIs or CMD?</i></li> </ul> </li> <li>• In your experience, how and how often are DHIs used for CV/DM?</li> <li>• Do these DHIs replace, enhance or provide additional care and support for patients?</li> </ul>                                                                                                                                                                                                                                                                                                                                                                                                                                                                       |
| Barriers and facilitators to use             | <p>In this section we will focus on barriers and facilitators to use. You can answer in reference to: DHIs you have experience of or other DHIs which have been used in cardiovascular disease, diabetes, or which affect these patient groups.</p> <ul style="list-style-type: none"> <li>• In your opinion, what features of DHIs for CV or DM affect their accessibility and usability to patients and the public? <ul style="list-style-type: none"> <li>○ <i>What are the facilitators or barriers?</i></li> <li>○ <i>What features affect how a DHI delivers its intended outcomes?</i></li> </ul> </li> <li>• As a health professional, what factors impact whether you recommend use of a particular DHI to a patient? <ul style="list-style-type: none"> <li>○ <i>For other HCPs, what is your experience/interactions with patients related to DHIs for CMD/CMD management?</i></li> <li>○ <i>Which apps have been more or less useful in the long-term?</i></li> </ul> </li> <li>• In your experience, what other reasons are there for end users to want or not want to use DHIs?</li> </ul> |
| Population differences in use of DHIs        | <p><u>Wider population</u></p> <ul style="list-style-type: none"> <li>• Are you aware of any patterns of differences in use of DHIs, for example by age, socioeconomic status, or ethnicity? <ul style="list-style-type: none"> <li>○ <i>What do you think are the reasons for these differences?</i></li> <li>○ <i>As use of DHIs becomes more widespread in health and care, which groups do you think will have greater or less access?</i></li> </ul> </li> </ul>                                                                                                                                                                                                                                                                                                                                                                                                                                                                                                                                                                                                                                    |

|                                                       |                                                                                                                                                                                                                                                                                                                                                                                                                                                                                                                                                                                                                                                                                                                                                                                                                                                                                                                                                                                  |
|-------------------------------------------------------|----------------------------------------------------------------------------------------------------------------------------------------------------------------------------------------------------------------------------------------------------------------------------------------------------------------------------------------------------------------------------------------------------------------------------------------------------------------------------------------------------------------------------------------------------------------------------------------------------------------------------------------------------------------------------------------------------------------------------------------------------------------------------------------------------------------------------------------------------------------------------------------------------------------------------------------------------------------------------------|
|                                                       | <p><u>Population – South Asian</u></p> <ul style="list-style-type: none"> <li>• Focussing on experience of DHIs of those of a South Asian background, can you share your experience or opinion on whether particular DHIs have been successful or unsuccessful in South Asian communities? <ul style="list-style-type: none"> <li>○ <i>What about these made them successful/unsuccessful?</i></li> </ul> </li> </ul> <p><u>Population - inequalities</u></p> <ul style="list-style-type: none"> <li>• What types of alternatives can you offer those without digital access?</li> <li>• Can you tell me about anything that could help people in these groups use DHIs (that we haven't already discussed)?</li> </ul>                                                                                                                                                                                                                                                          |
| Part 2                                                | <i>In this section we will explore the impact of the coronavirus pandemic on use of DHIs. Recognise that this is a sensitive topic for many individuals, and if people feel the need to withdraw at any point in the discussion they can do so.</i>                                                                                                                                                                                                                                                                                                                                                                                                                                                                                                                                                                                                                                                                                                                              |
| Coronavirus impact on health management               | <ul style="list-style-type: none"> <li>• How has the coronavirus pandemic changed the way you support patients? <ul style="list-style-type: none"> <li>○ <i>to manage CVD/DM?</i></li> <li>○ <i>changes in use to DHIs?</i></li> </ul> </li> </ul>                                                                                                                                                                                                                                                                                                                                                                                                                                                                                                                                                                                                                                                                                                                               |
| Use of coronavirus DHIs/ Coronavirus and inequalities | <ul style="list-style-type: none"> <li>• In your experience, how have patients and the public used technology to get information about coronavirus, or to take any action related to coronavirus (like testing or vaccination)? <ul style="list-style-type: none"> <li>○ <i>If applicable to your area of work, were you able to offer official information about coronavirus or about action, such as testing or vaccination, in ways that are not digital?</i></li> <li>○ <i>If specific information related to coronavirus and CVD/DM was available, were the formats appropriate to your patient population?</i></li> </ul> </li> <li>• In your experience or opinion, have there been inequalities arising from the use of technology in healthcare during coronavirus? <ul style="list-style-type: none"> <li>○ <i>Were there any specific patterns of use that you found interesting or concerning? (Any specific to South Asian populations?)</i></li> </ul> </li> </ul> |
| Wrap-up                                               | <ul style="list-style-type: none"> <li>• Summarise key points in each topic</li> <li>• Any new or closing comments from participants</li> </ul>                                                                                                                                                                                                                                                                                                                                                                                                                                                                                                                                                                                                                                                                                                                                                                                                                                  |
| Session close                                         | <ul style="list-style-type: none"> <li>• Thank for participation</li> <li>• Signpost to consent form regarding consent, data protection, outputs of session and contacting research team</li> <li>• Remind participants that they will receive their £50 voucher and a sources of further support sheet in the post.</li> </ul>                                                                                                                                                                                                                                                                                                                                                                                                                                                                                                                                                                                                                                                  |
